# Supplementary material
Source: publisher figshare collection journal article supplement (https://tandf.figshare.com/ndownloader/files/16125716)
Supplement: Supplementary file 1 [file 16125716]

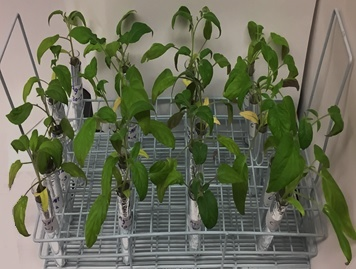


SI.1- Plant growth in Hoagland media in a controlled environment at 25±2oC and a 16hr/day photoperiod.


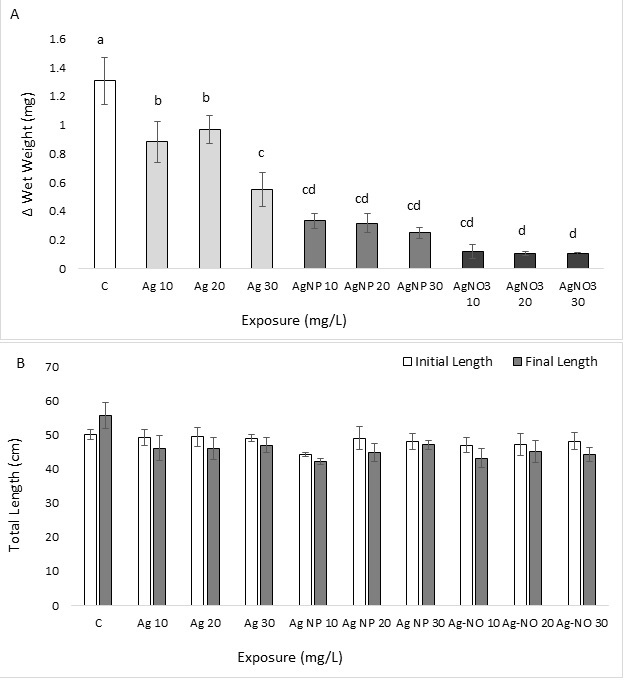


SI.2- Changes in the total wet weight (A) and total length (B) of plants after 7 days exposure to silver (Ag), silver nanoparticle (AgNP), and silver nitrate (AgNO3). Different letters show significant difference in final-initial wet weight.
